# Supplementary material for: Development of a high throughput drug screening assay to identify compounds that protect oligodendrocyte viability and differentiation under inflammatory conditions
Source: PubMed Central journal article supplement (PMC5024459; doi:10.1186/s13104-016-2219-8), 2016-09-05
Supplement: 13104_2016_2219_MOESM1_ESM.pdf [file 13104_2016_2219_MOESM1_ESM.pdf]

**Table S1.** Acute OL differentiation hit compounds tested in the IFN $\gamma$  protection assay.

| Compound              | Drug Class                     | Viability (AB)<br>EC <sub>50</sub> [ $\mu$ M] | OL diff (MBP)<br>EC <sub>50</sub> [ $\mu$ M] |
|-----------------------|--------------------------------|-----------------------------------------------|----------------------------------------------|
| Raloxifene            | Hormone                        | 0.036                                         | 0.0034                                       |
| Toremifene            |                                | 0.049                                         | 0.014                                        |
| Tamoxifen             |                                | 0.039                                         | 0.017                                        |
| Perphenazine          | Tricyclic anti-depressants     | 0.057                                         | 0.035                                        |
| Fluphenazine          |                                | 0.041                                         | 0.012                                        |
| Prochlorperazine      |                                | 0.049                                         | 0.016                                        |
| Trifluoperazine       |                                | 0.054                                         | 0.015                                        |
| Quetiapine            | Non-Tricyclic anti-depressants | 0.13                                          | 0.074                                        |
| Perospirone           |                                | 0.12                                          | 0.012                                        |
| Nitalapram/Citalopram |                                | 0.52                                          | -                                            |
| Escitalopram          |                                | 0.66                                          | 0.54                                         |
| Metylperon            |                                | 4.2                                           | 1.3                                          |
| Bupropion             |                                | 7.1                                           | 1.3                                          |
| Clemastine fumarate   | Muscarinic                     | 0.053                                         | 0.44                                         |
| Cogentin/Benztropine  |                                | 0.014                                         | 0.04                                         |
| Donepezil             |                                | 0.53                                          | 0.3                                          |
| Vesamicol             |                                | 2.9                                           | 0.019                                        |
| Oxybutynin            |                                | 0.37                                          | 0.13                                         |
| Ipratropium           |                                | 0.23                                          | 0.028                                        |
| Salmeterol            | Adrenergic                     | 0.28                                          | 0.075                                        |
| Betaxolol             |                                | 2.2                                           | 0.19                                         |
| Esmolol               |                                | -                                             | -                                            |
| Ifenprodil            | Ion Channel                    | 0.4                                           | 0.24                                         |
| Benproperine          |                                | 0.52                                          | 0.072                                        |
| Proxymetacaine        |                                | 2                                             | 0.094                                        |
| Dofetilide            |                                | -                                             | -                                            |
| DMPP**                |                                | 160                                           | 0.89                                         |
| Bifonazole            | Anti-fungal                    | 0.46                                          | 0.13                                         |
| Clotrimazole          |                                | 0.66                                          | -                                            |
| Ketoconazole          |                                | 0.43                                          | -                                            |

\*\*Dimethylphenylpiperazinium
