# Supplementary material for: Development of a high throughput drug screening assay to identify compounds that protect oligodendrocyte viability and differentiation under inflammatory conditions
Source: PubMed Central journal article supplement (PMC5024459; doi:10.1186/s13104-016-2219-8), 2016-09-05
Supplement: 13104_2016_2219_MOESM2_ESM.pdf [file 13104_2016_2219_MOESM2_ESM.pdf]

Fig. S1

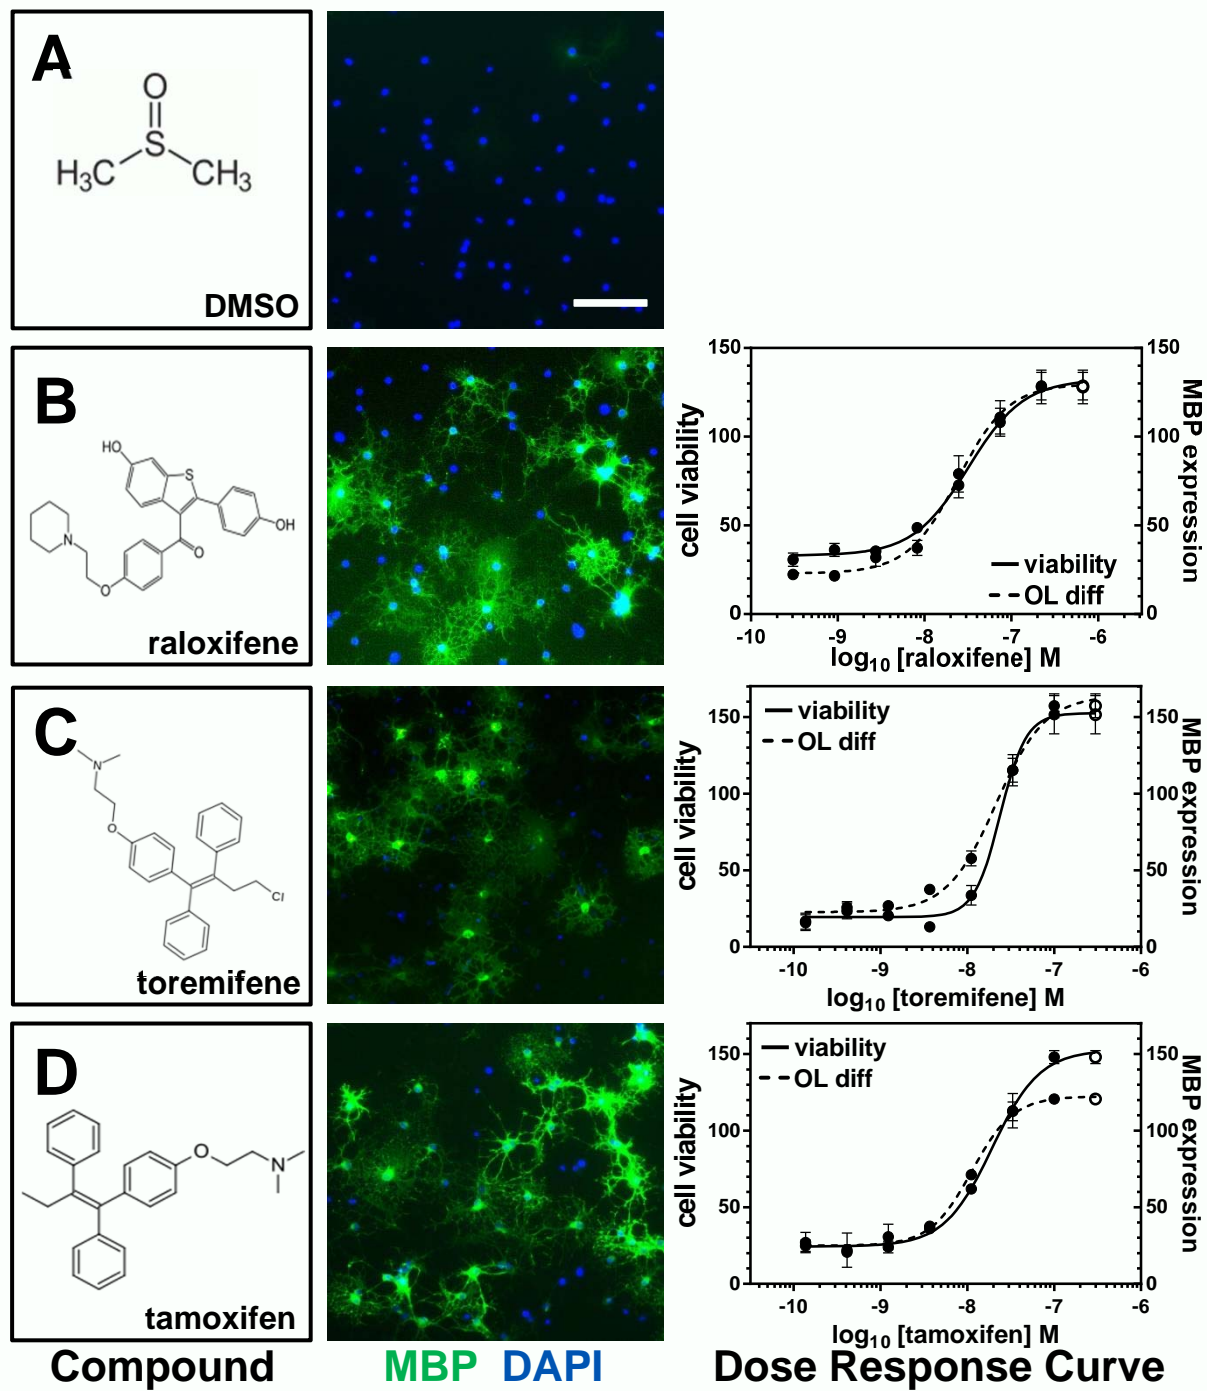

Fig. S1

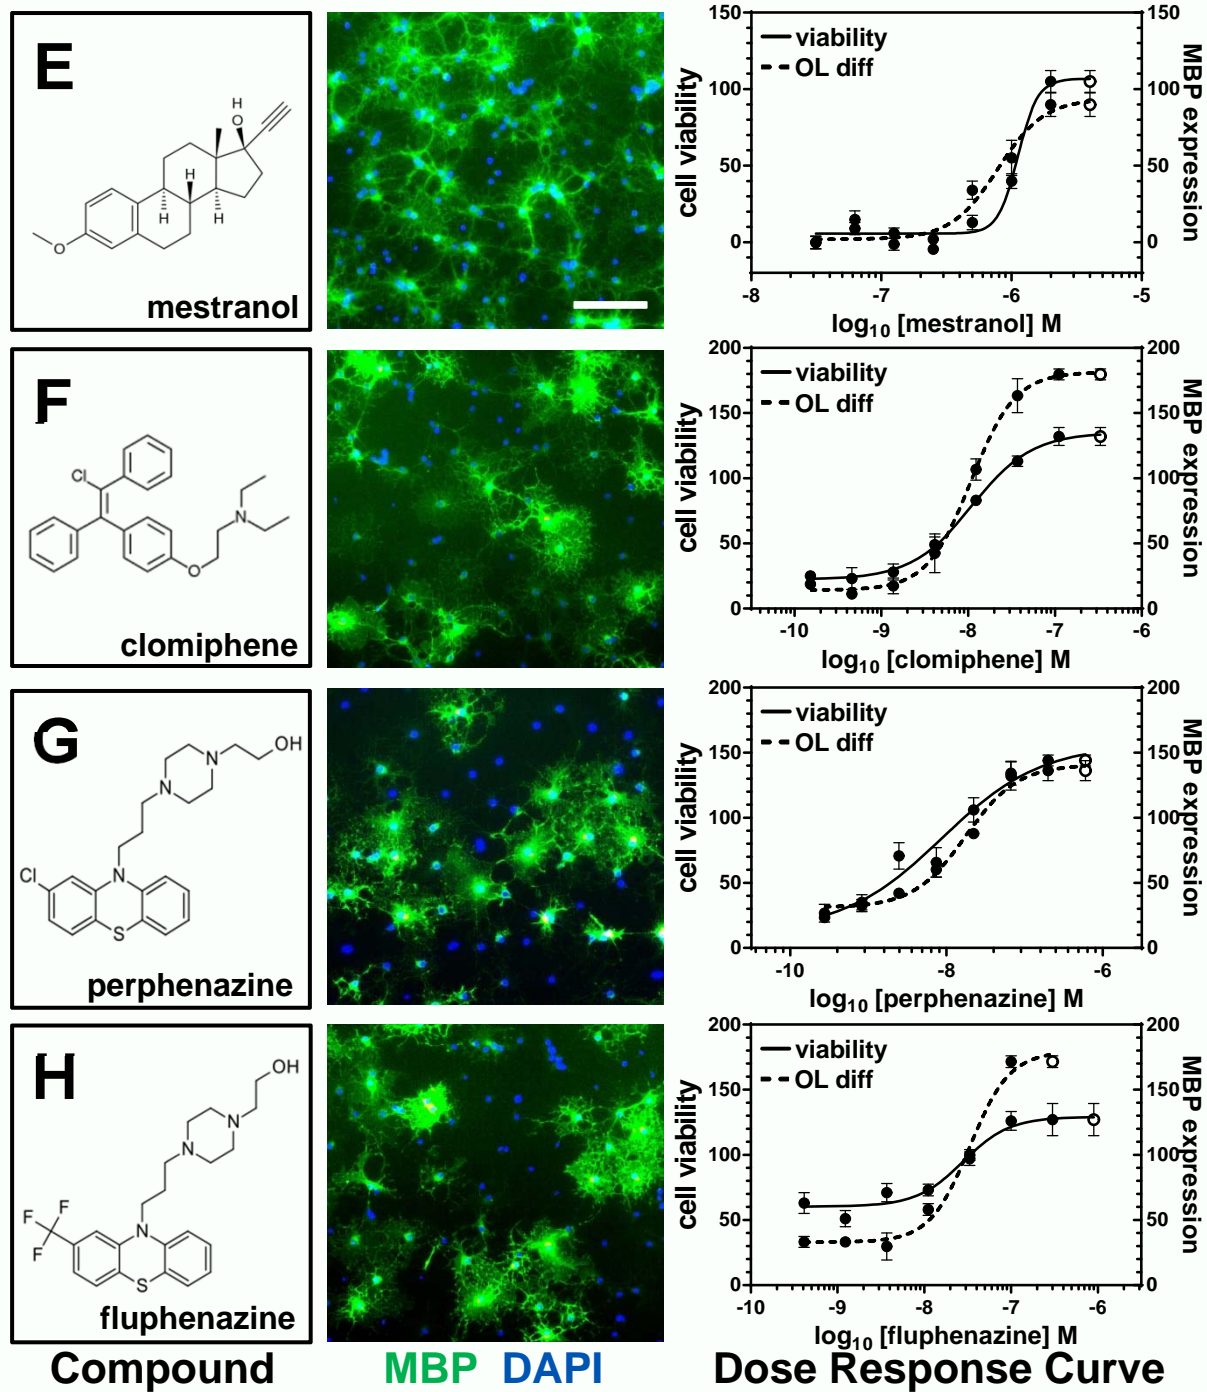

Fig. S1

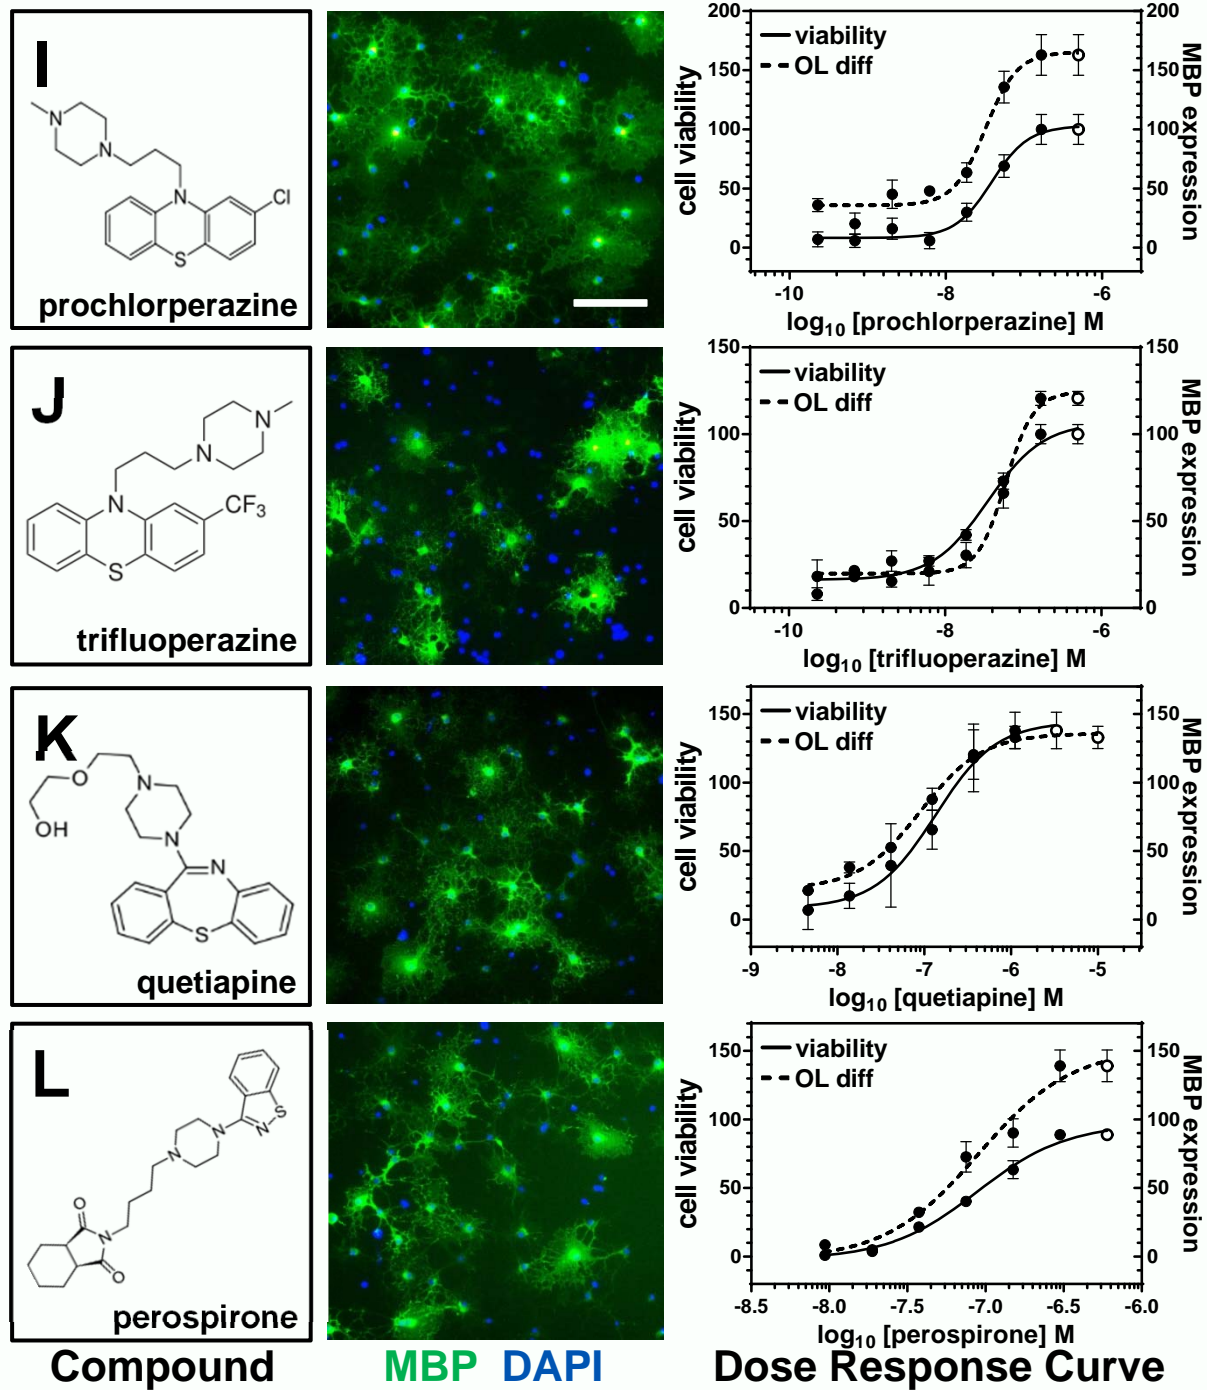

Fig. S1

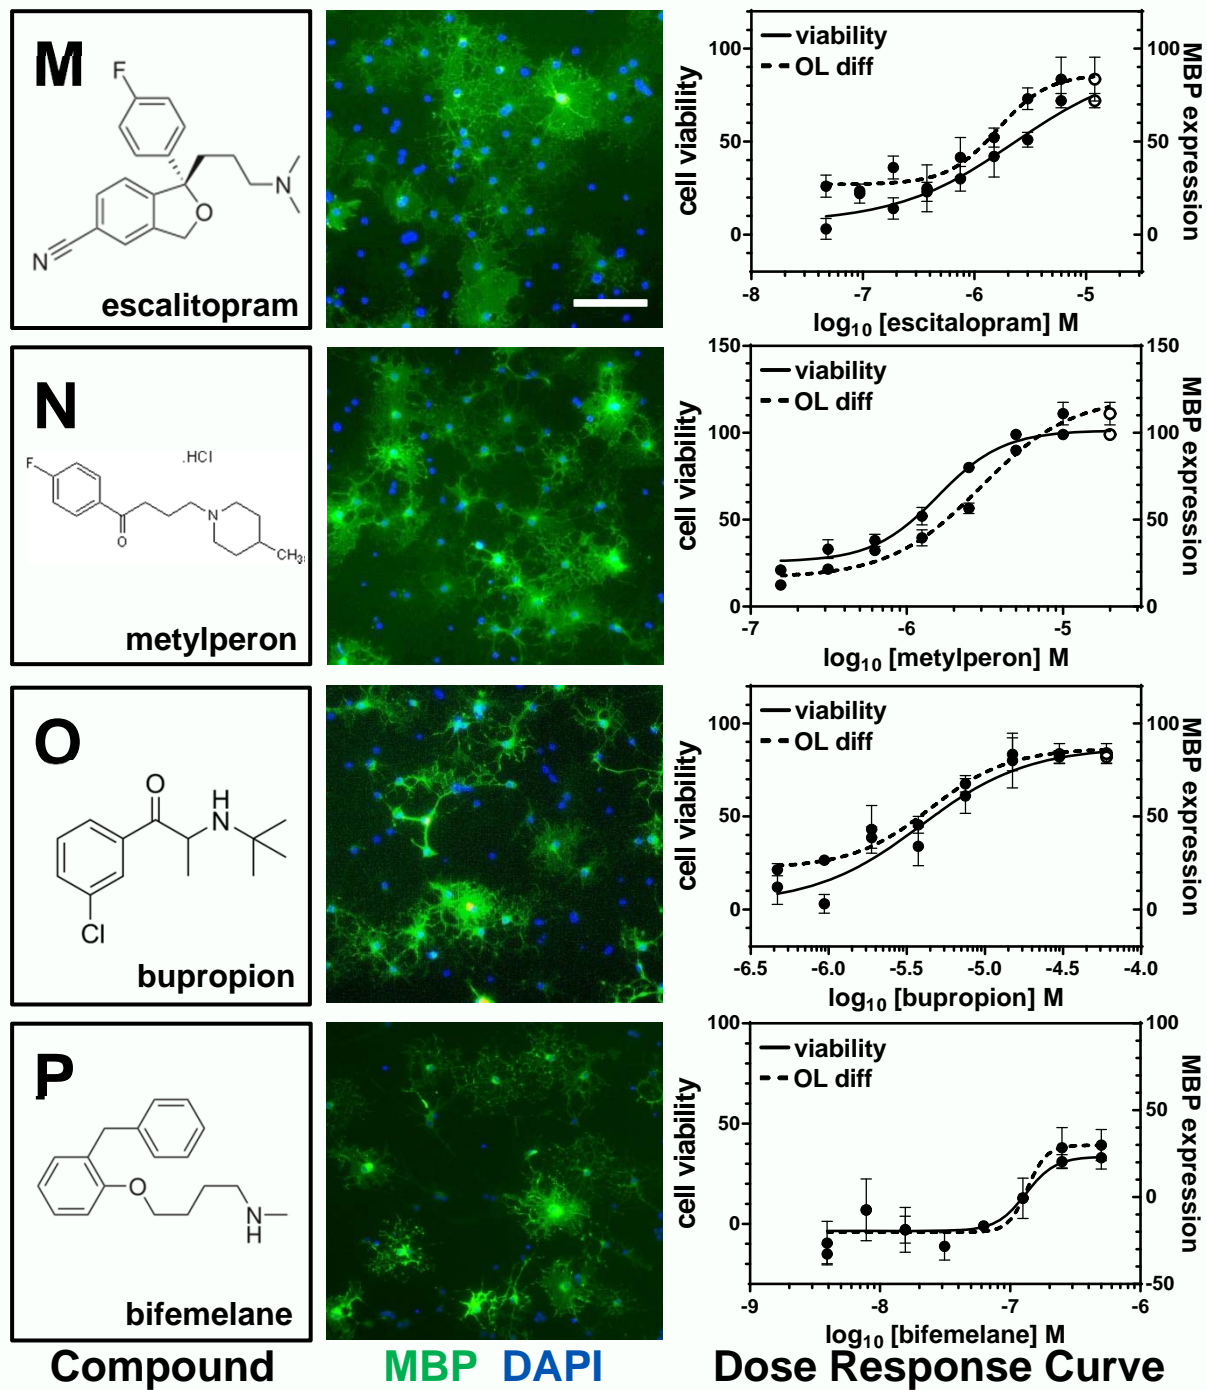

Fig. S1

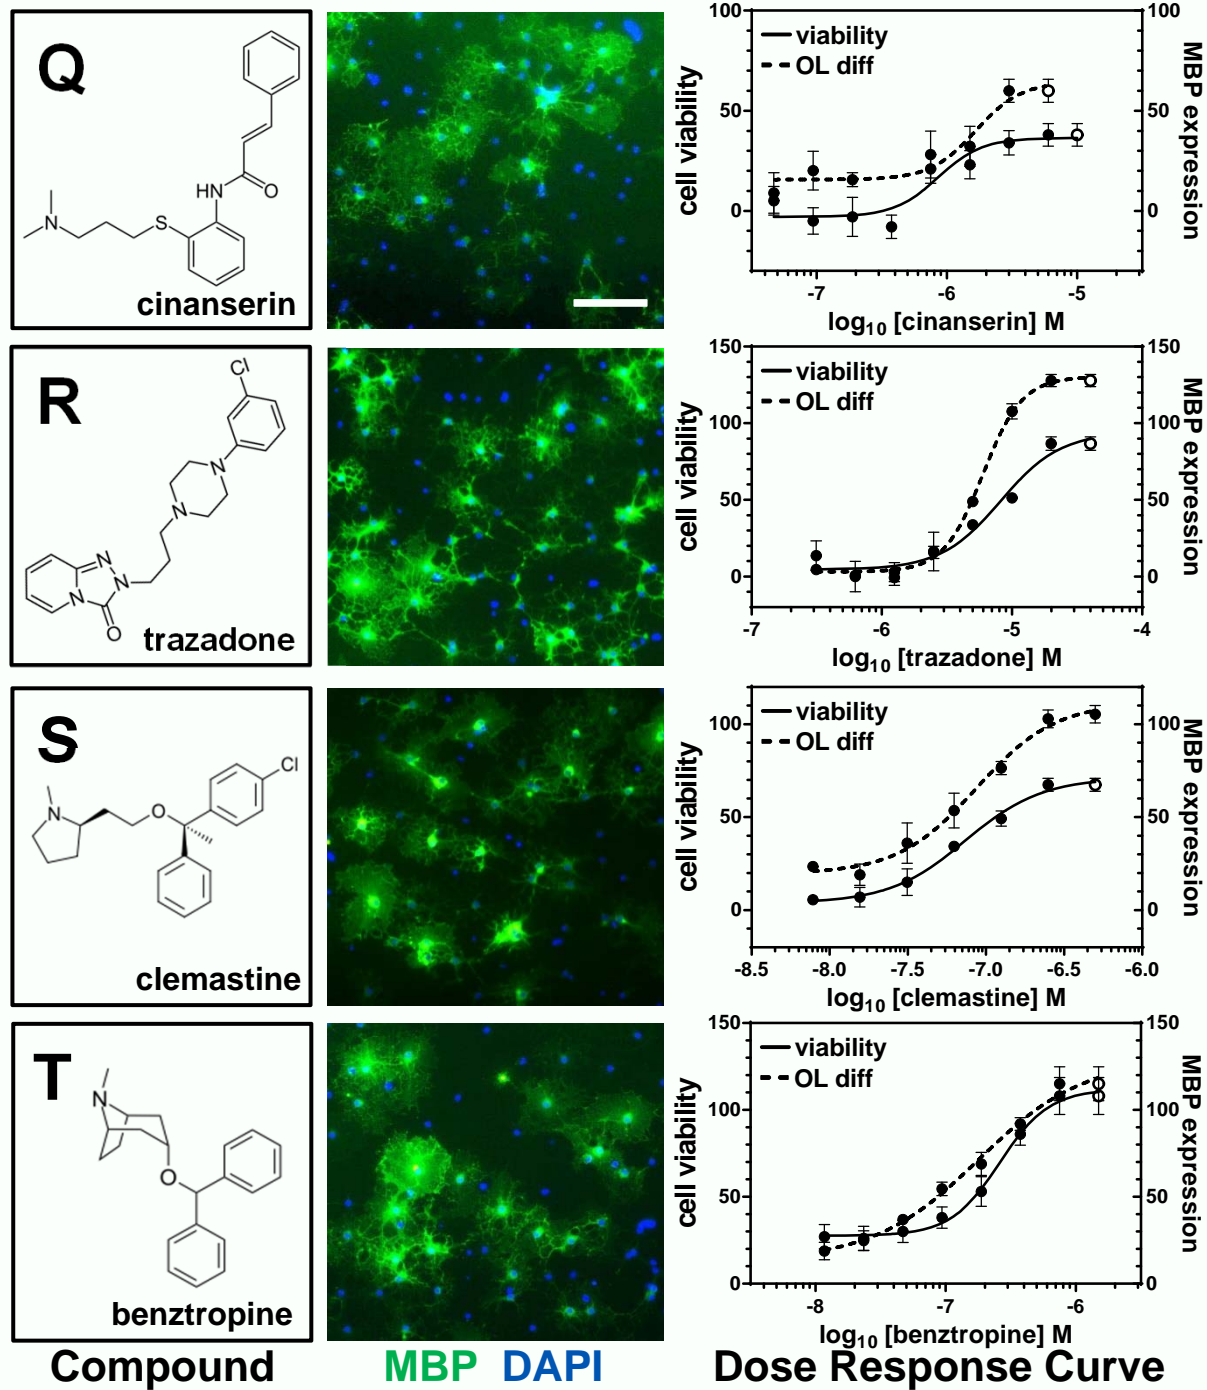

Fig. S1

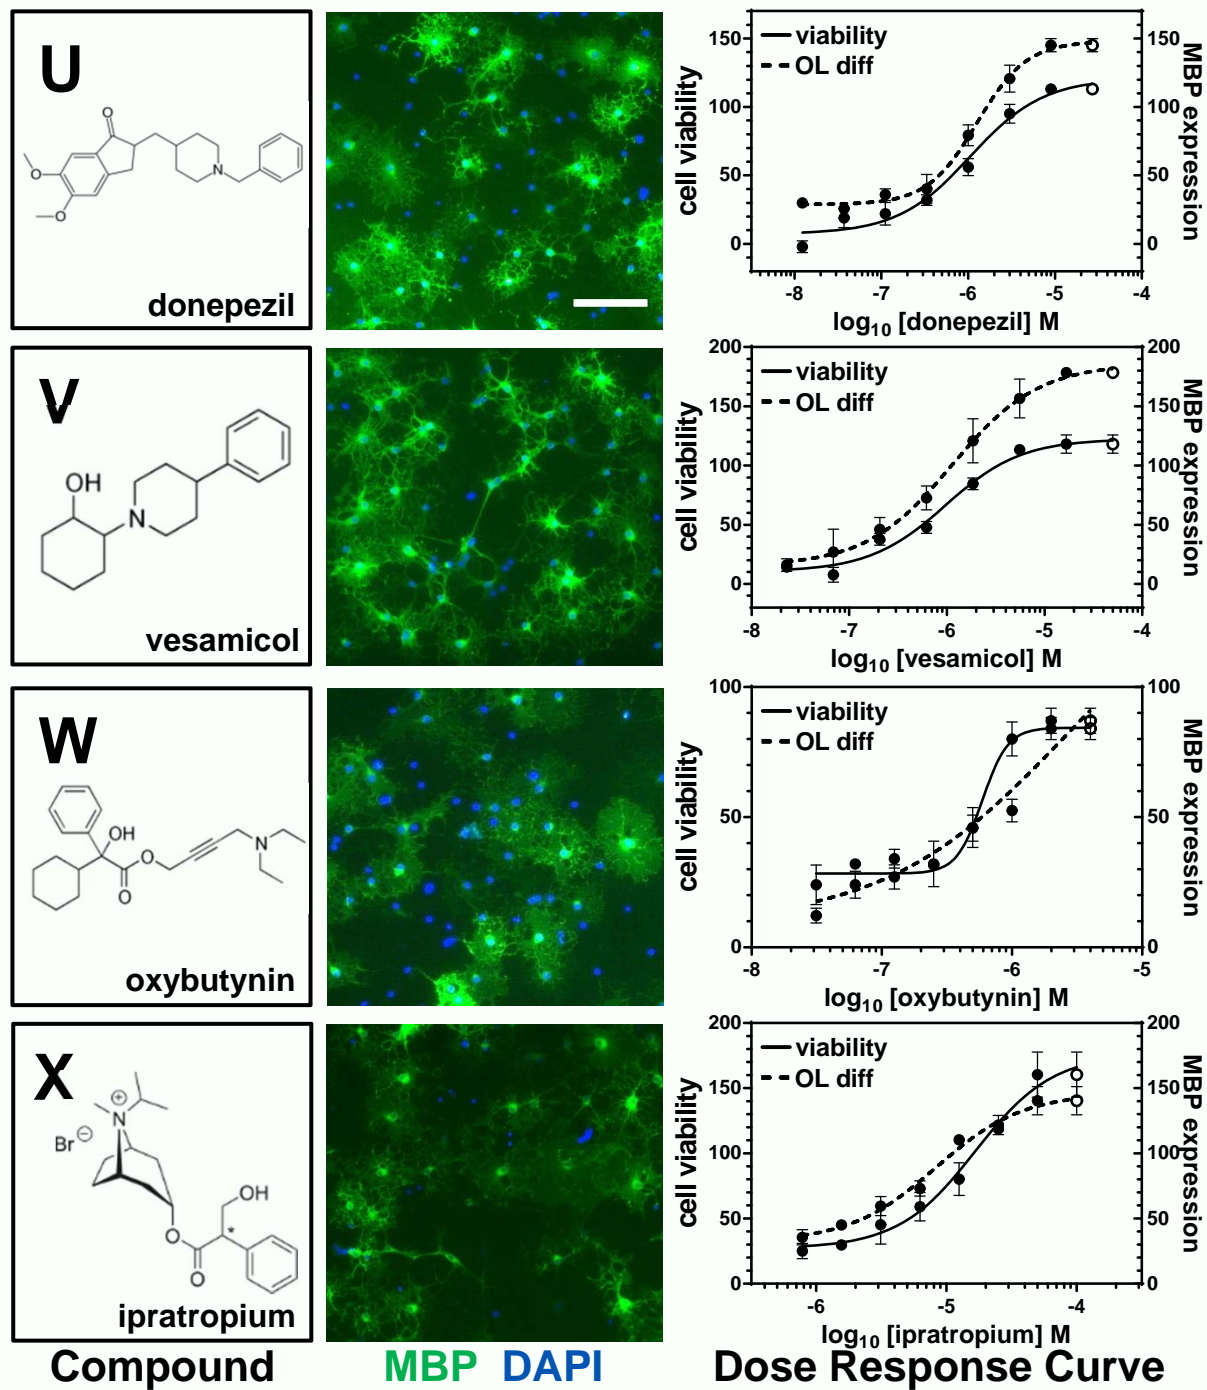

Fig. S1

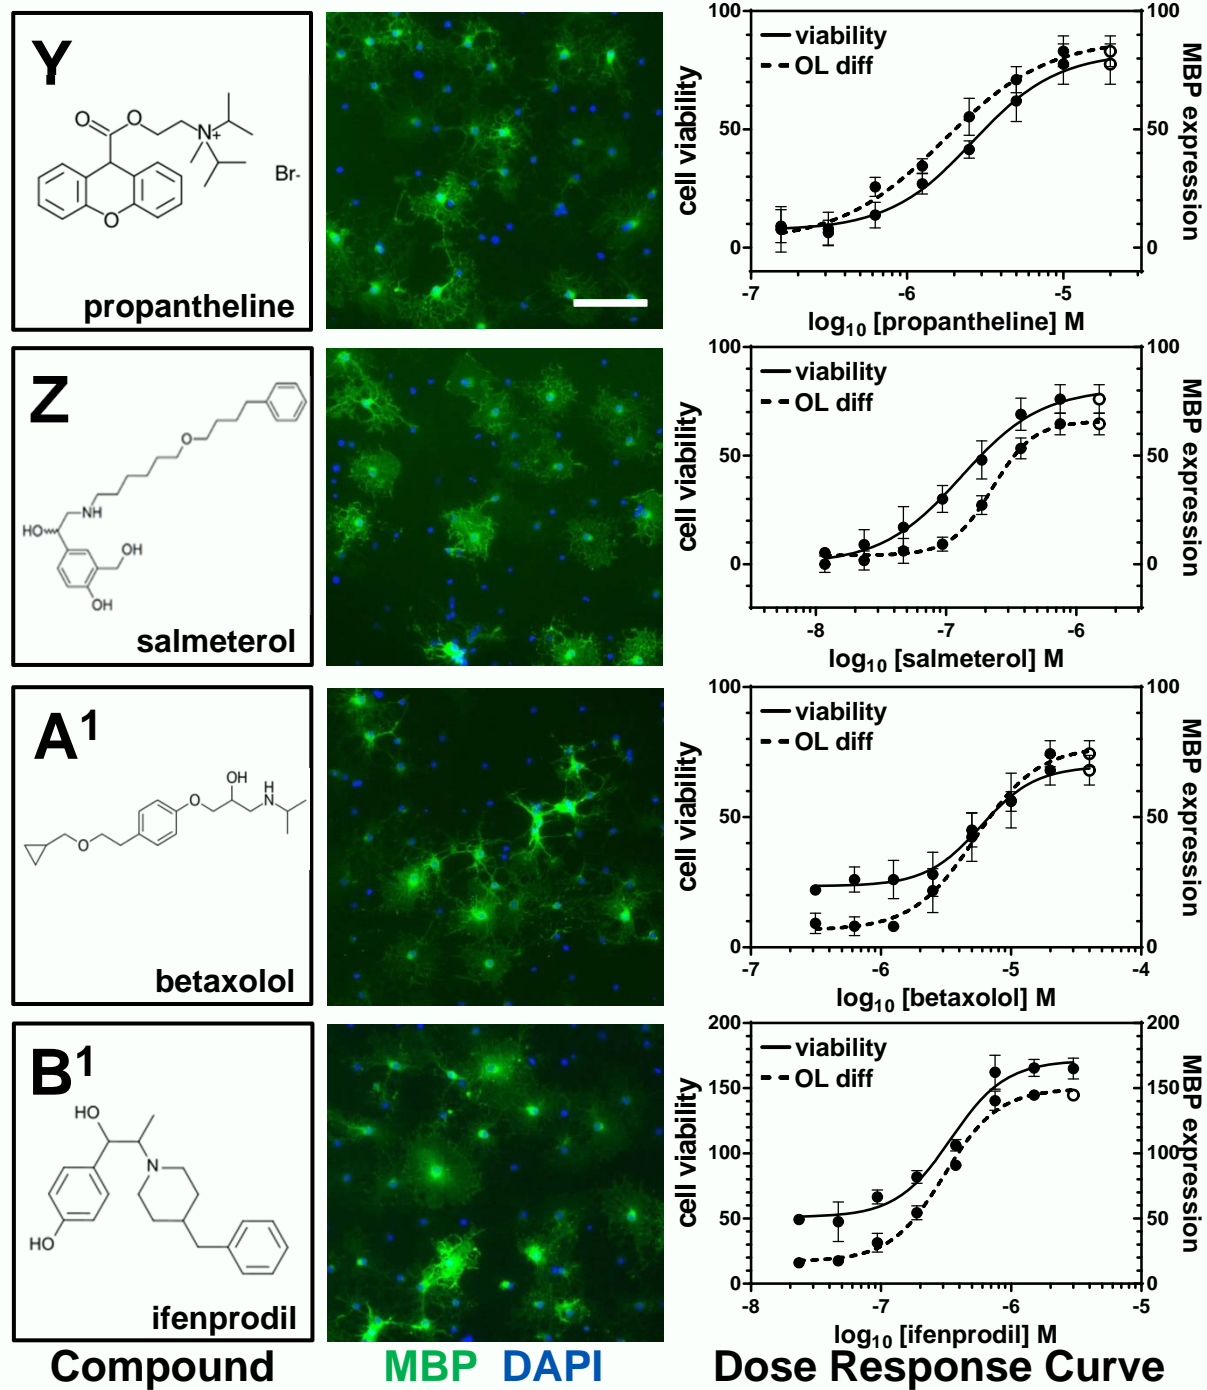

Fig. S1

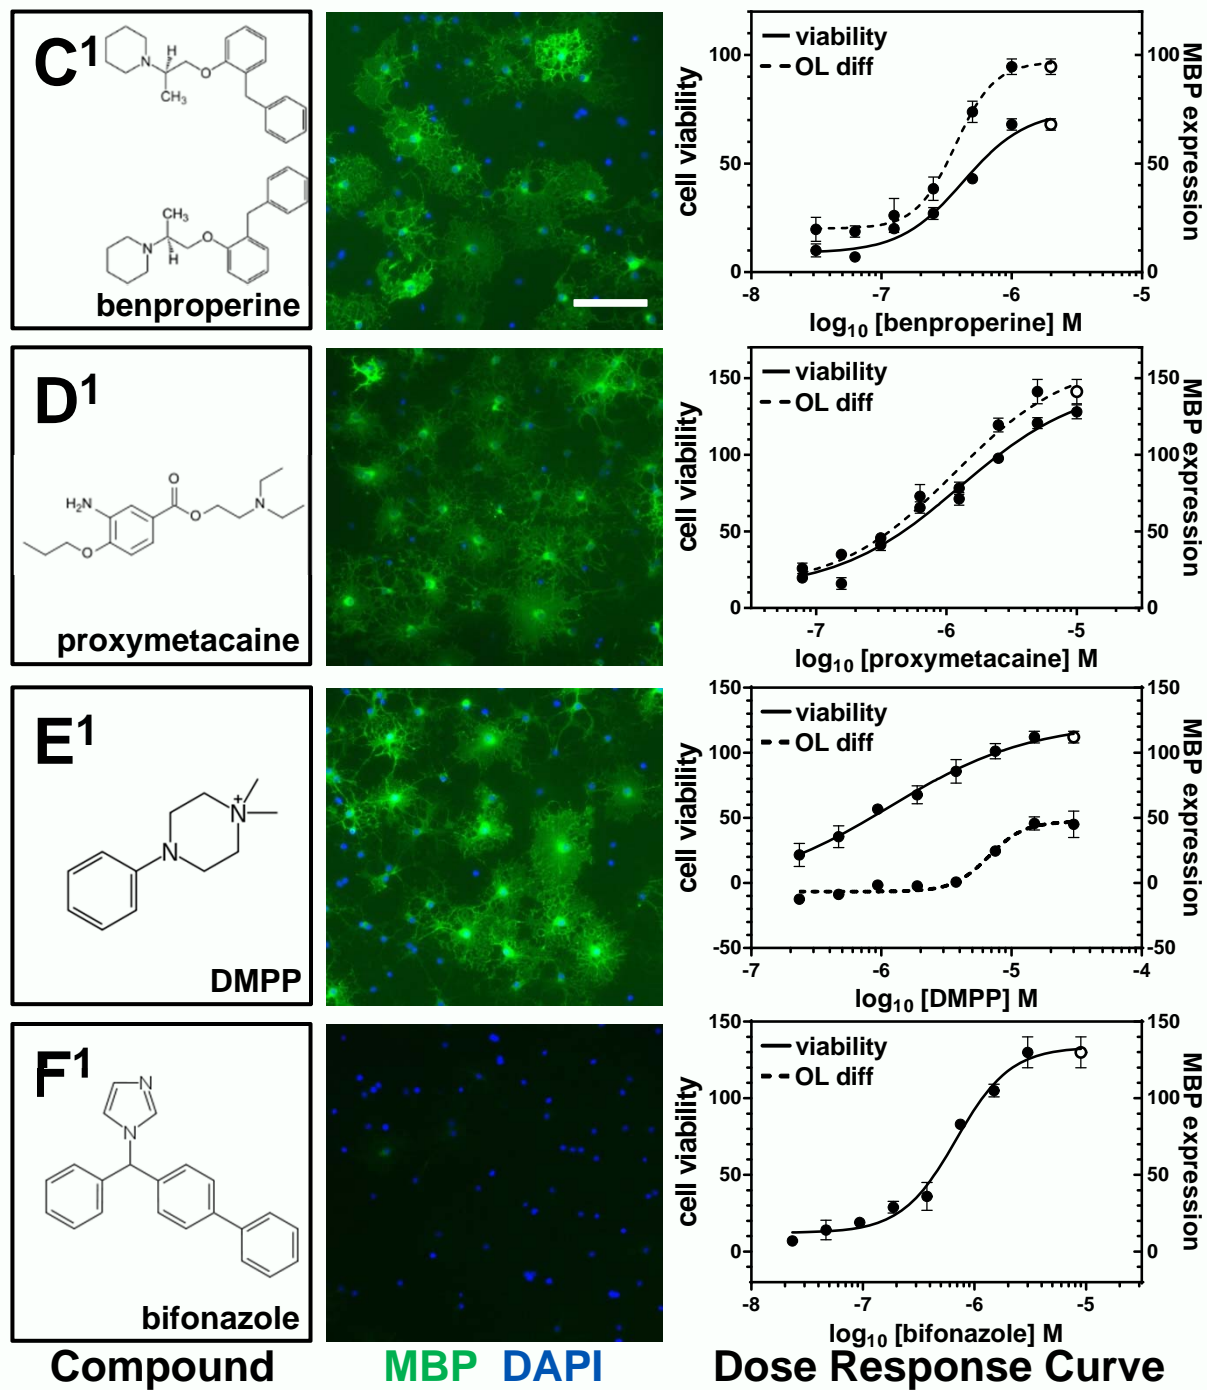



Fig. S1

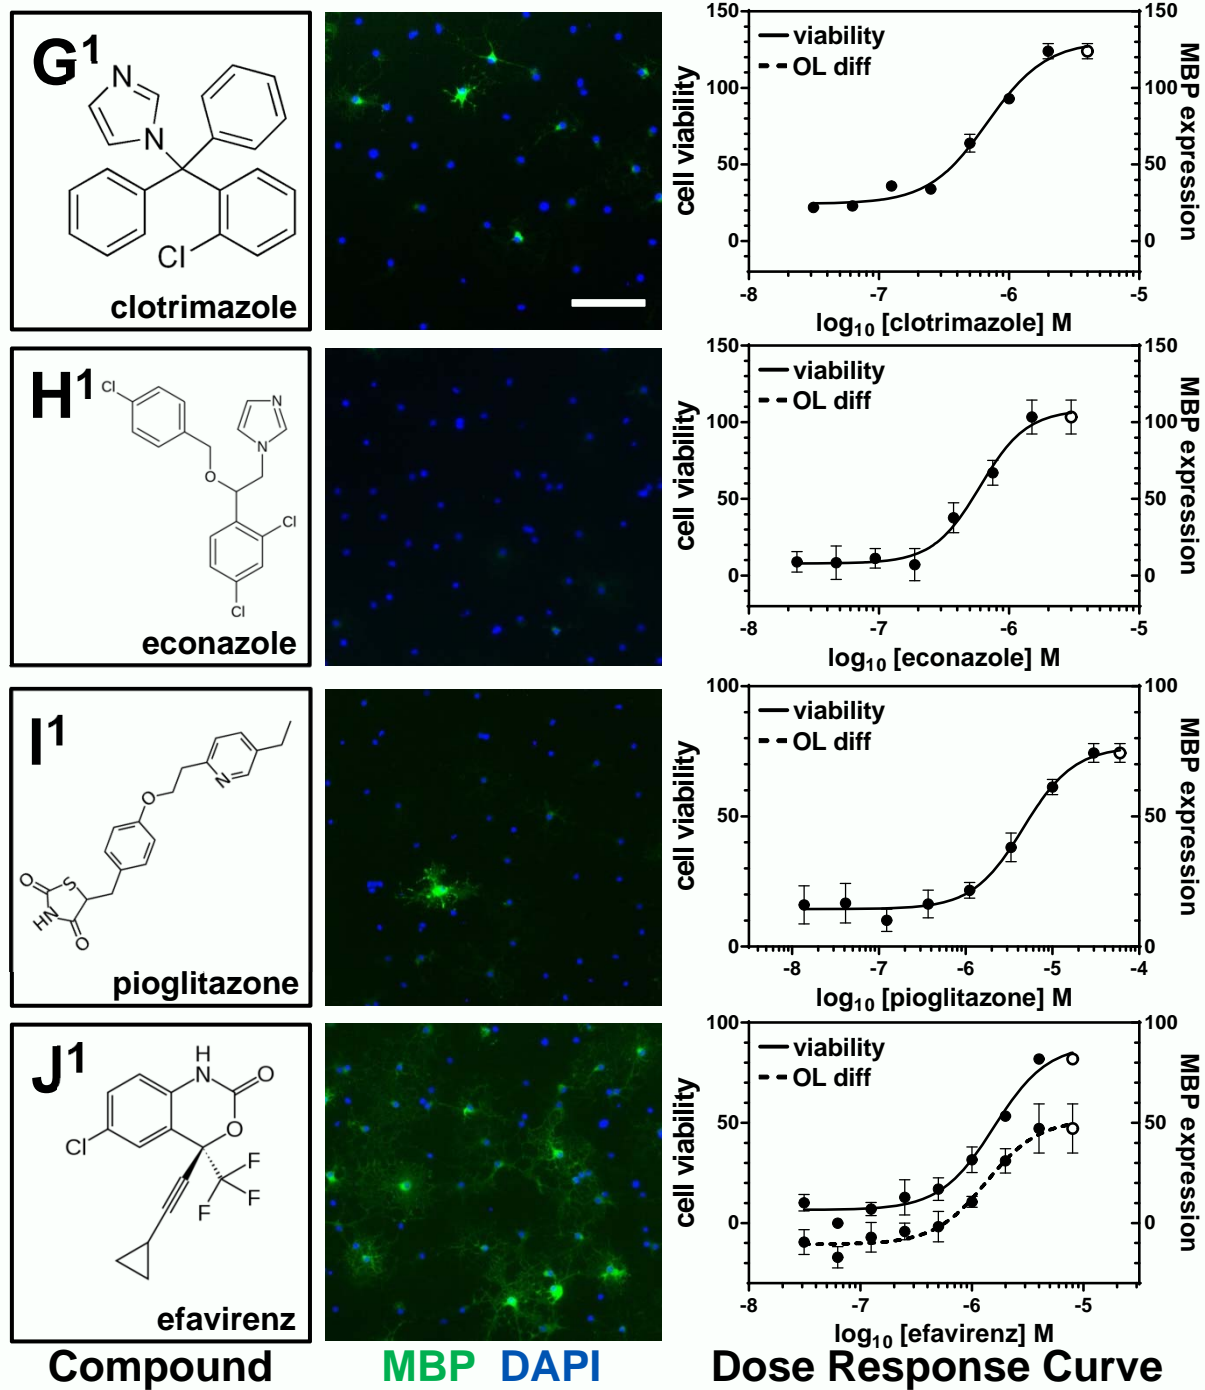

Fig. S1

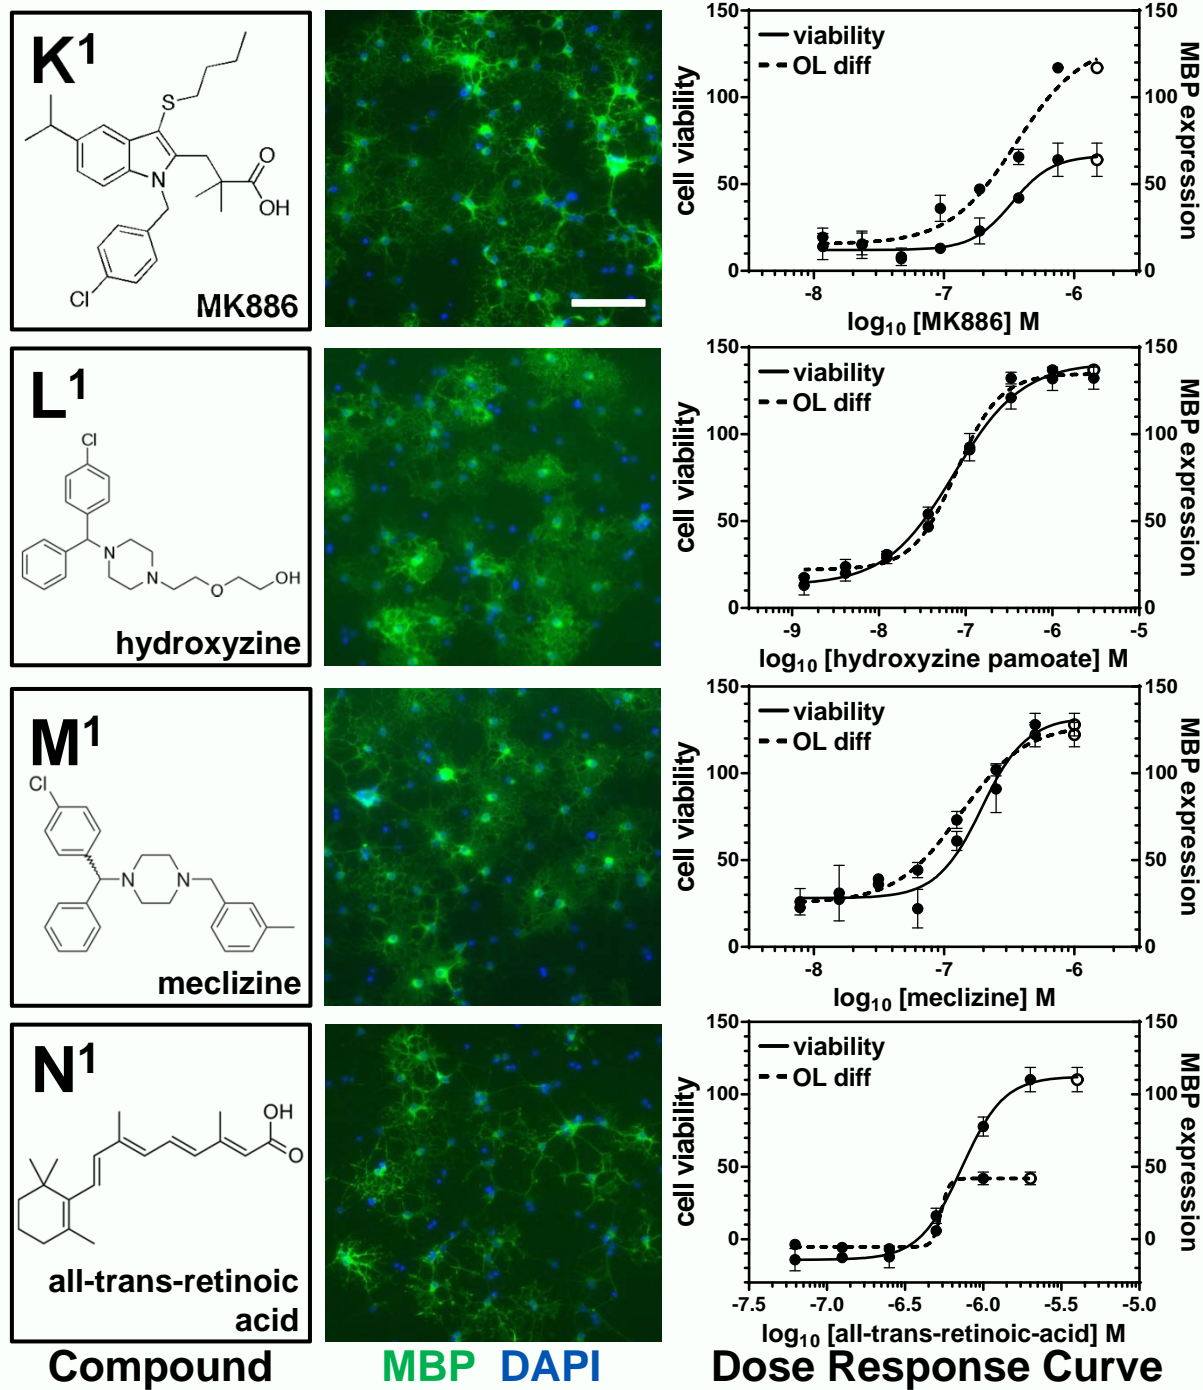

Fig. S1

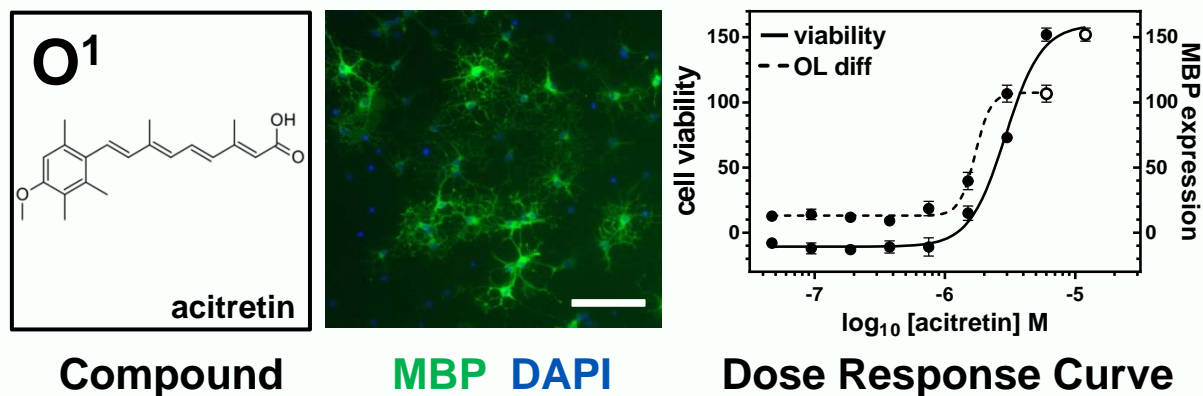

**Figure S1. Structures, images, and  $EC_{50}$ s of cytokine protection hits.** A-O<sup>1</sup> first column, Chemical structure and name of each hit compound and 0.1% DMSO. A-O<sup>1</sup> second column, Example image of each hit compound at the most efficacious concentration showing MBP (green) and DAPI (blue) staining. Bar = 100  $\mu$ M. A-O<sup>1</sup> third column, Representative dose-response curves of viability (solid lines) and OL differentiation (dashed lines) in cytokine protection assay for each hit compound. Open circles indicate points added to round off the curve. Note that no OL differentiation dose response curves are shown for the bifonazole, clotrimazole, econazole, and piaglitazone because they rescued survival but not MBP expression.
