# Supplementary material for: Development of a high throughput drug screening assay to identify compounds that protect oligodendrocyte viability and differentiation under inflammatory conditions
Source: PubMed Central journal article supplement (PMC5024459; doi:10.1186/s13104-016-2219-8), 2016-09-05
Supplement: 13104_2016_2219_MOESM4_ESM.pdf [file 13104_2016_2219_MOESM4_ESM.pdf]

## Table S3. Antibodies

| Antibody                    | Source                 | Host   | Dilution | Cell Marker              |
|-----------------------------|------------------------|--------|----------|--------------------------|
| Myelin basic protein (MBP)  | Abcam ab7349           | Rat    | 1:500    | Oligodendrocyte          |
| Olig2                       | Millipore AB9610       | Rabbit | 1:1500   | OPCs and Oligodendrocyte |
| CNP                         | Millipore MAB326       | Mouse  | 1:1000   | Oligodendrocyte          |
| GalC                        | Hybridoma supernatant* | Mouse  | 1:25     | Oligodendrocyte          |
| Anti-rat Alexa Fluor 488    | Molecular Probes       | Goat   | 1:1000   | Secondary antibody       |
| Anti-rabbit Alexa Fluor 594 | Molecular Probes       | Goat   | 1:1000   | Secondary antibody       |
| Anti-mouse Alexa Fluor 594  | Molecular Probes       | Goat   | 1:1000   | Secondary antibody       |

\*Ranscht et al., 1982
